# Supplementary material for: DNALI1 deficiency causes male infertility with severe asthenozoospermia in humans and mice by disrupting the assembly of the flagellar inner dynein arms and fibrous sheath
Source: PubMed Central journal article supplement (PMC9932082; doi:10.1038/s41419-023-05653-y), 2023-02-15

Related to Figure 1C

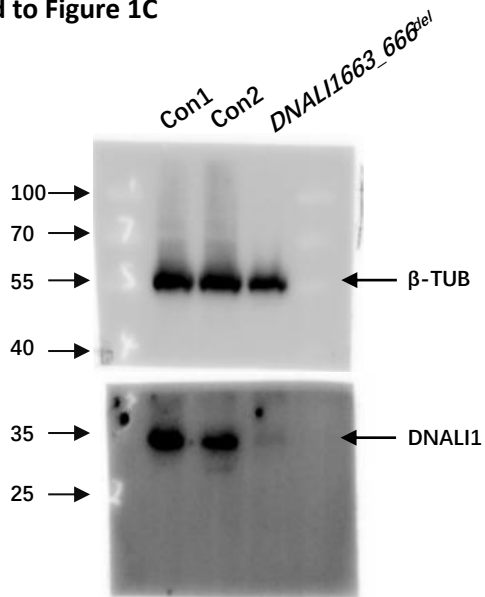

Related to Figure 2C

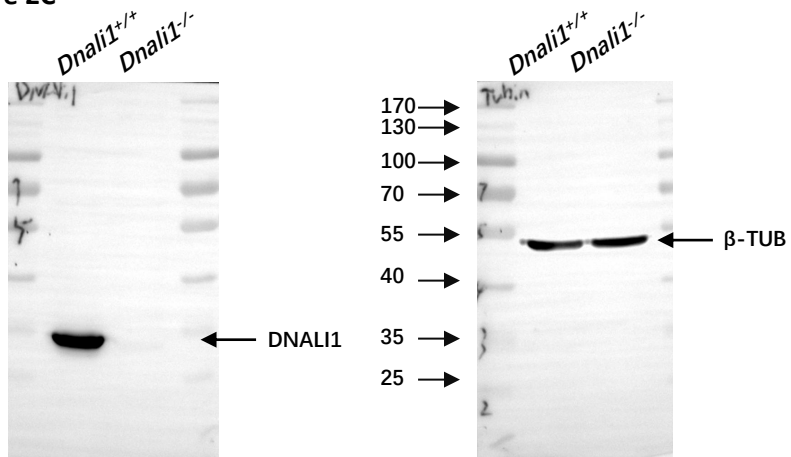

Supplement: 41419_2023_5653_MOESM8_ESM.pdf [file 41419_2023_5653_MOESM8_ESM.pdf]
